# Supplementary material for: Understanding the Dynamic of Rice Farming Systems in Southern Mozambique to Improve Production and Benefits to Smallholders
Source: MDPI journal article supplement (doi:10.3390/agronomy11051018), 2021-05-20
Supplement: s1 [file s1]

## Supplementary Materials

**Table S1.** Socio-economic and demographic characteristics of the surveyed households in the CIS.

| Variables                                  | Frequency | Percentage % |
|--------------------------------------------|-----------|--------------|
| <b>First occupation</b>                    |           |              |
| Farming Rice                               | 332       | 97.4         |
| Farming + Other activities                 | 9         | 4.2          |
| Total                                      | 341       | 100          |
| <b>Land access</b>                         |           |              |
| Heritage                                   | 210       | 70.4         |
| Lending                                    | 60        | 17.6         |
| Associative                                | 41        | 12           |
| Total                                      | 341       | 100          |
| <b>Distance to farming field (minutes)</b> |           |              |
| <30 minutes                                | 52        | 15.2         |
| 30–45 minutes                              | 177       | 5.9          |
| 46–60 minutes                              | 13        | 3.8          |
| >60 minutes                                | 99        | 29           |
| Total                                      | 341       | 100          |
| <b>Type of fertiliser</b>                  |           |              |
| No                                         | 256       | 74           |
| NPK                                        | 1         | 0.3          |
| Urea                                       | 42        | 12.1         |
| Urea/NPK                                   | 42        | 12.1         |
| Total                                      | 341       | 100          |
| <b>Eventual hired labour</b>               |           |              |
| No                                         | 47        | 13.8         |
| Yes                                        | 294       | 86.2         |
| Total                                      | 341       | 100          |
| <b>Permanent hired worker</b>              |           |              |
| No                                         | 328       | 96.2         |
| Yes                                        | 13        | 3.8          |
| Total                                      | 341       | 100          |
| <b>Livestock production</b>                |           |              |
| No                                         | 95        | 28           |
| Yes                                        | 246       | 72           |
| Total                                      | 341       | 100          |
| <b>Destination of the output</b>           |           |              |
| Consumption                                | 117       | 34           |
| Consumption and sale                       | 224       | 66           |
| Total                                      | 341       | 100          |
